# Supplementary material for: Eg5 Overexpression Is Predictive of Poor Prognosis in Hepatocellular Carcinoma Patients
Source: Hindawi journal article supplement (doi:10.1155/2017/2176460), 2017-01-01
Supplement: f1 [file 2176460.f1.pdf]

**Supplementary Table . RT-PCR Primers**

| <b>Gene</b>                     | <b>Primer sequences</b>               |
|---------------------------------|---------------------------------------|
| <b>Eg5</b>                      | F: 5'-GAA CAA TCA TTA GCA GCA GAA-3 ' |
|                                 | R: 5'-TCA GTA TAG ACA CCA CAG TTG-3'  |
| <b><math>\beta</math>-actin</b> | F: 5' -TAA TCT TCG CCT TAA TAC TT-3'  |
|                                 | R: 5'-AGC CTT CAT ACA TCT CAA-3'      |
